# Supplementary material for: Morphology and Vessel Density of the Macula in Preterm Children Using Optical Coherence Tomography Angiography
Source: MDPI journal article supplement (doi:10.3390/jcm11051337), 2022-02-28
Supplement: s1 [file s1]

**Table S1.** Clinical and ophthalmic characteristics of preterm children – comparison between analyzed eyes and eyes excluded from the analysis. Data are presented as a number (%) or median and interquartile range (IQR).

| Parameter                        | GCC                    |                     |                  | OCTA                  |                       |                  | CCT                   |                       |         |
|----------------------------------|------------------------|---------------------|------------------|-----------------------|-----------------------|------------------|-----------------------|-----------------------|---------|
|                                  | Analyzed eyes N=203    | Excluded eyes N=43  | P-value          | Analyzed eyes N=106   | Excluded eyes N=140   | P-value          | Analyzed eyes N=179   | Excluded eyes N=43    | P-value |
| Age, years                       | 10.7 (7.4-13.1)        | 9.5 (8.8-11.4)      | 0.272            | 12 (9.1-14.4)         | 9.3 (6.9-11.1)        | <b>&lt;0.001</b> | 10.3 (8.3-12.7)       | 10.8 (7.1-13.1)       | 0.919   |
| Birth weight <1500 g, N (%)      | 83 (40.9%)             | 7 (16.3%)           | <b>0.002</b>     | 45 (42.5%)            | 45 (32.1%)            | <b>0.043</b>     | 67 (37.4%)            | 23 (53.5%)            | 0.679   |
| Gestational Age <28 weeks, N (%) | 47 (23.2%)             | 23 (43.5%)          | <b>&lt;0.001</b> | 18 (16.98%)           | 52 (37.1%)            | <b>0.005</b>     | 50 (27.9%)            | 20 (46.5%)            | 0.766   |
| Apgar score <4, N (%)            | 32 (15.8%)             | 14 (32.6%)          | 0.227            | 15 (14.2%)            | 31 (22.1%)            | 0.131            | 33 (18.4%)            | 13 (30.2%)            | 0.739   |
| ROP, N (%)                       | 98 (48.3%)             | 36 (83.7%)          | <b>&lt;0.001</b> | 50 (47.2%)            | 40 (28.6%)            | <b>&lt;0.001</b> | 92 (51.4%)            | 42 (97.7%)            | 0.191   |
| ROP with treatment, N (%)        | 40 (19.7%)             | 28 (65.1%)          | <b>&lt;0.001</b> | 18 (17%)              | 50 (35.7%)            | 0.544            | 52 (29.1%)            | 17 (39.5%)            | 0.081   |
| Visual Acuity (logMAR)           | 0 (0.1- 0) N=179       | 0.1 (0.5-0) N=28    | <b>0.001</b>     | 0 (0.5-0) N=93        | 0.1 (0.22-0) N=114    | <b>&lt;0.001</b> | 0 (0.1-0) N=161       | 0.9 (0.6-0) N=46      | 0.084   |
| Refractive error (Dioptres)      | 1.0 (-0.38-2.27) N=172 | -3.0 (-7.25-3) N=27 | <b>0.014</b>     | 0.5 (-0.75-1.25) N=83 | 1.0 (-0.87-3.0) N=116 | 0.122            | 1.0 (-0.5-2.27) N=172 | -3.0 (-7.25-3.0) N=27 | 0.670   |

N – number of eyes, ROP – retinopathy of prematurity, GCC – ganglion cell complex, OCTA- optical coherence tomography angiography, CCT- central choroidal thickness, p-value <0.05 are considered statistically significant
